# Supplementary material for: A Novel Strategy for Screening Tumor-Specific Variable Domain of Heavy-Chain Antibodies
Source: MDPI journal article supplement (doi:10.3390/ijms241310804), 2023-06-28
Supplement: s1 [file s1]

## Supplementary Materials

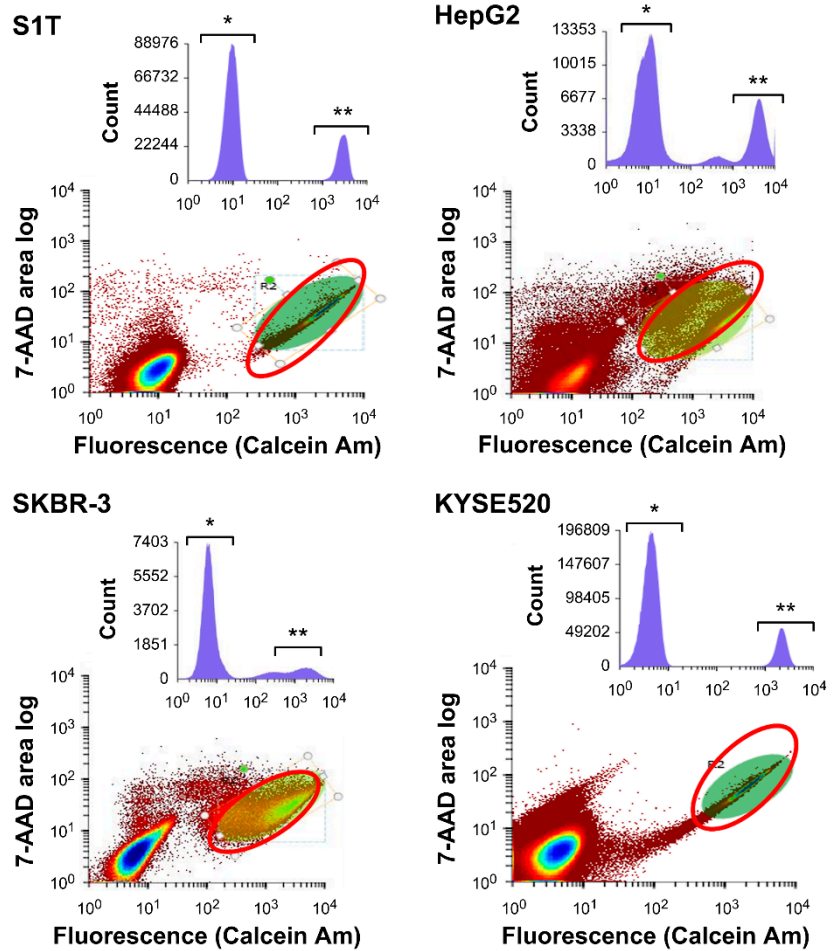

**Figure S1. Phage library enrichment using fluorescence-activated cell sorting (FACS).** The calcein-AM stained target cancer cells were separated from the absorbent cells, indicated by red circles. The remaining high-density populations near the baseline were absorbent cells. The Y-axis in the lower graph indicates the 7-AAD area log to focus on dead cells, while the X-axis indicates the fluorescence (calcein-AM) area log. The red circles represent the cells that rescue the binding phages. The upper panel focuses on the histogram of absorbent cells and calcein-AM-reacted target cells for each diagram. The single asterisk (\*) indicates the absorbent cells, while the double asterisk (\*\*) indicates calcein-AM-stained target cells. The absorbent cells were three cancer cell lines.

| Clone name                    | CDR3              | Clone name                 | CDR3                | Clone name          | CDR3               | Clone name            | CDR3         |
|-------------------------------|-------------------|----------------------------|---------------------|---------------------|--------------------|-----------------------|--------------|
| KYSE20.5 -NAGA-----           | ---SSPD TGYEYD--- | SIT.17 ARRGSYWCSG          | ---VDTLYG YDI       | SIT.38 R-----       | ---YVNNYGS RY      | HepG2.10 NS-----      | ---APTL RAY  |
| KYSE20.8 -NAGA-----           | ---SSPD TGYEYD--- | SIT.22 ARRGSYWCSG          | ---YDLSLYG YDI      | SIT.45 R-----       | ---YVNNYGS RY      | HepG2.18 NS-----      | ---APTL RAY  |
| KYSE20.13 -NAGA-----          | ---SSPD TGYEYD--- | SIT.30 ARRGSYWCSG          | ---YDLSLYG YDI      | SIT.50 R-----       | ---YVNNYGS RY      | HepG2.20 NS-----      | ---APTL RAY  |
| KYSE20.16 -NAGA-----          | ---SSPD TGYEYD--- | SIT.33 ARRGSYWCSG          | ---YDLSLYG YDI      | SIT.10 R-----       | ---YVNNYGS RY      | HepG2.28 NS-----      | ---APTL RAY  |
| KYSE20.18 -NAGA-----          | ---SSPD TGYEYD--- | SIT.42 ARRGSYWCSG          | ---VDTLYG YDI       | SIT.6 KVVVLTTGGL    | ---RD              | HepG2.29 NS-----      | ---APTL RAY  |
| KYSE20.25 -NAGA-----          | ---SSPD TGYEYD--- | SIT.19 -NADIRL---          | ---RGSTSS GVI       | SIT.8 KVVVLTTGGL    | ---RD              | HepG2.50 NS-----      | ---APTL RAY  |
| KYSE20.28 -NAGA-----          | ---SSPD TGYEYD--- | SIT.21 -NADIRL---          | ---ALRSR---         | SIT.11 KVVVLTTGGL   | ---RD              | HepG2.14 NT-----      | ---APTL RAY  |
| KYSE20.29 -NAGA-----          | ---SSPD TGYEYD--- | SIT.28 -NMWPTG---          | ---S4-----          | SIT.12 KVVVLTTGGL   | ---RD              | HepG2.19 NT-----      | ---APTL RAY  |
| KYSE20.35 -NAGA-----          | ---SSPD TGYEYD--- | SIT.49 RADIM---            | ---KMTTYSY KL       | SIT.32 KVVVLTTGGL   | ---RD              | HepG2.39 -T-----      | ---EPTL RAY  |
| KYSE20.44 -NAGA-----          | ---SSPD TGYEYD--- | SKBR3.35 NSGCG-----        | ---GLRDV GP         | SIT.43 KVVVLTTGGL   | ---RD              | HepG2.7 NT-----       | ---AVTL RAY  |
| KYSE20.47 -NAGA-----          | ---SSPD TGYEYD--- | SIT.25 NAGCG-----          | ---P1-----          | SIT.46 KVVVLTTGGL   | ---RD              | HepG2.30 NTW-----     | ---PTL RYI   |
| KYSE20.50 -NAGA-----          | ---SSPD TGYEYD--- | KYSE20.15 -AMGD-MYSL RPPSN | ---P1-----          | SKBR3.40 KVVVLTTGGL | ---RD              | SKBR3.11 NV-----      | ---RAY       |
| KYSE20.7 -NAGA-----           | ---SSPD TGYEYD--- | KYSE20.14 -AMGD-MYSL RPPSN | ---P1-----          | SKBR3.44 KVVVLTTGGL | ---RD              | SKBR3.21 NV-----      | ---RAY       |
| KYSE20.37 -NAGA-----          | ---SSPD TGYEYD--- | KYSE20.22 -AMGE-MYSL RPPSN | ---P1-----          | SKBR3.45 KVVVLTTGGL | ---RD              | SKBR3.25 NTLRQPPF     | ---          |
| KYSE20.20 -NAGA-----          | ---SSPD TGYEYD--- | KYSE20.40 -AMGE-MYSL RPPSN | ---P1-----          | SKBR3.34 NV-----    | ---RD              | SKBR3.46 NTLRQPPF     | ---          |
| KYSE20.1 -NAGA-----           | ---SSSS A-EYD---  | KYSE20.34 -AMGD-MYSL RPPSN | ---P1-----          | SKBR3.32 NI-----    | ---DGR LG          | SKBR3.10 VVGLRVGSK    | ---          |
| KYSE20.23 -NAGA-----          | ---SSSS A-EYD---  | KYSE20.26 -AMGD-MYSL RPPSN | ---P1-----          | SKBR3.13 NTLRTPV    | ---                | HepG2.8 TTA-----      | ---PWS5 GCV  |
| KYSE20.3 -NAGA-----           | ---SSSS A-EYD---  | KYSE20.6 NALGRGVYGA Y-DD   | ---D1-----          | SKBR3.28 NTLRTPV    | ---                | HepG2.24 TTA-----     | ---PWS5 GCV  |
| KYSE20.9 -NAGA-----           | ---SSSS A-EYD---  | KYSE20.31 NALGRGVYGA Y-DD  | ---D1-----          | SKBR3.18 NTLRTPV    | ---                | HepG2.33 TTA-----     | ---PWS5 GCV  |
| KYSE20.10 -NAGM-----          | ---LSSS A-TYD---  | KYSE20.24 -NMGQVWGA Y-GG   | ---D4-----          | SKBR3.47 NTLRTPV    | ---                | SIT.5 NTANPP          | ---YFN       |
| KYSE20.19 -YVEM-----          | ---LSSS A-TYD---  | SKBR3.29 NTLRTPV           | ---                 | SKBR3.46 NTLRTPV    | ---                | SIT.47 NTANPP         | ---YFN       |
| KYSE20.21 -ATGGCYCLG FSDFWASD | ---EYD---         | SIT.4 FVTHSDW---           | ---DPGV VG          | HepG2.49 RQ-----    | ---YMGVCT KD       | SKBR3.26 NTANPP       | ---YFN       |
| KYSE20.32 -NLVE PFGLG         | ---GDEND---       | SIT.7 FVTHSDW---           | ---DPGV VG          | SIT.2 RQ-----       | ---YMGVCT KD       | SKBR3.5 NTARQPPF      | ---          |
| KYSE20.41 -NLVVPFCW           | ---LSSEND---      | SIT.22 FVTHSDW---          | ---DPGV VG          | SIT.9 RQ-----       | ---YMGVCT KD       | SKBR3.14 YADRWIDR     | ---QAY       |
| KYSE20.48 -NLVVPFCYA          | ---LSSEND---      | SIT.29 FVTHSDW---          | ---DPGV VG          | SIT.36 RQ-----      | ---YMGVCT KD       | HepG2.41 N-----       | ---DPVNT WRV |
| KYSE20.11 -NAVE PFGLG         | ---SGEYSD---      | SIT.40 FVTHSDW---          | ---DPGV VG          | SKBR3.48 NTLRTPV    | ---                | HepG2.40 NGRRLDWGE    | ---Y         |
| KYSE20.12 -NLISPYGV           | ---GSEYSD---      | SIT.41 FVTHSDW---          | ---DPGV VG          | KYSE20.36 TQ-----   | ---G FGSDYLVY SD   | HepG2.11 QRTFNS       | ---          |
| KYSE20.42 -NLISPYGV           | ---GSEYSD---      | SIT.44 FVTHSDW---          | ---DPGV VG          | SIT.34 KV-----      | ---G VSAPPFPVVE SD | HepG2.44 QRTFNSWNGH   | ---GGS       |
| KYSE20.17 -NLISPYGV           | ---GDEYSD---      | SKBR3.7 FVTHSDW---         | ---DPGV VG          | SIT.9 NT-----       | ---EPTL RA         | SIT.1 RLDATKDNRN F IR | ---          |
| KYSE20.13 -NLISPYGV           | ---GDOYD---       | SKBR3.20 FVTHSDW---        | ---DPGV VG          | HepG2.8 NT-----     | ---EPTL RA         | SKBR3.9 NV-----       | ---PYER VTY  |
| KYSE20.39 -NLISPYGV           | ---GDEYD---       | SKBR3.37 FVTHSDW---        | ---DPGV VG          | HepG2.9 NT-----     | ---EPTL RA         | SKBR3.3 NI-----       | ---NNGY VDY  |
| KYSE20.30 -NLISPYGV           | ---RDEYD---       | HepG2.15 AA-----           | ---DQ YCWFYPTLD FG  | HepG2.12 NT-----    | ---EPTL RA         | SKBR3.4 NI-----       | ---NNGY VDY  |
| SIT.36 -ANDGQISLW WNWPE       | ---RYD---         | HepG2.17 AA-----           | ---DQ YCWFYPTLD FG  | HepG2.21 NT-----    | ---EPTL RA         | SKBR3.6 NTVRQPPF      | ---          |
| SIT.20 -AKPPONLRN FRITOI      | ---YT-----        | HepG2.25 AA-----           | ---DQ YCWFYPTLD FG  | HepG2.23 NT-----    | ---EPTL RA         | SKBR3.24 NTVRQPPF     | ---          |
| SIT.37 -AKVFDNRN FRITIS       | ---YD-----        | HepG2.27 AA-----           | ---DQ YCWFYPTLD FG  | HepG2.26 NT-----    | ---EPTL RA         | SKBR3.27 NTVRQPPF     | ---          |
| KYSE20.4 -NADITTY--           | ---TSGGYPASR      | HepG2.39 AA-----           | ---DQ YCWFYPTLD FG  | HepG2.32 NT-----    | ---EPTL RA         | SKBR3.19 NTVRQPPF     | ---          |
| KYSE20.24 -CHAHVLG---         | ---GTYYPEEF       | SIT.14 AA-----             | ---DQ YCWFYPTLD FG  | HepG2.37 NT-----    | ---EPTL RA         | SKBR3.22 NTVRQPPF     | ---          |
| KYSE20.43 -NAHGVLC---         | ---GTYYPEEF       | SIT.24 AA-----             | ---DQ YCWFYPTLD FG  | HepG2.38 NT-----    | ---EPTL RA         | SKBR3.39 NTVRQPPF     | ---          |
| KYSE20.45 -NAHGVLC---         | ---GTYYPEEF       | SIT.39 AA-----             | ---DQ YCWFYPTLD FG  | HepG2.43 NT-----    | ---EPTL RA         | SKBR3.29 NTVRQPPF     | ---          |
| KYSE20.39 -NAHGVLC---         | ---GTYYPEEF       | SIT.48 AA-----             | ---DQ YCWFYPTLD FG  | HepG2.46 NT-----    | ---EPTL RA         | SKBR3.50 NTVRQPPF     | ---          |
| KYSE20.27 SAR-----            | ---YYL-----       | SKBR3.8 AA-----            | ---DQ YCWFYPTLD FG  | HepG2.47 NT-----    | ---EPTL RA         | SIT.18 FARVVDWVG ESW  | ---          |
| HepG2.3 -NAGELRSYT QWGMESG    | ---               | SKBR3.15 AA-----           | ---DQ YCWFYPTLD FG  | HepG2.48 NT-----    | ---EPTL RA         | SIT.31 FARVVDWVG ESW  | ---          |
| HepG2.16 -NAGELRSYT QWGMESG   | ---               | SKBR3.16 AA-----           | ---DR YCGYFFPTLD FG | HepG2.49 NT-----    | ---EPTL RA         | SKBR3.1 NL-----       | ---DNGI PSY  |
| HepG2.34 -NAGELRSYT QWGMESG   | ---               | SKBR3.30 AA-----           | ---DQ YCWFYPTLD FG  | HepG2.46 NT-----    | ---EPTL RA         | SKBR3.12 NL-----      | ---DNGI PSY  |
| SIT.13 A-----ADIRTAQ DLCEYNST | ---               | SKBR3.31 AA-----           | ---DQ YCWFYPTLD FG  | HepG2.47 NT-----    | ---EPTL RA         | SKBR3.17 NL-----      | ---DNGI PSY  |
| SIT.13 -NADIQYIA-----         | ---DGFYYSKAR      | SKBR3.36 A-----            | ---DQ YCWFYPTLD FG  | HepG2.48 NT-----    | ---EPTL RA         | SKBR3.41 NL-----      | ---DNGI PSY  |
| SIT.36 -NADIQYIA-----         | ---DGFYYSKAR      | SKBR3.36 A-----            | ---DQ YCWFYPTLD FG  | HepG2.49 NT-----    | ---EPTL RA         | SKBR3.43 NL-----      | ---DNGI PSY  |
| SIT.27 -NADIQYIR-----         | ---DGFYYSKAR      | SKBR3.36 A-----            | ---DQ YCWFYPTLD FG  | HepG2.2 NS-----     | ---APTL RAY        | SKBR3.2 NL-----       | ---DQAL SNY  |
| SIT.15 -TRAGANVTR GP-----     | ---               | SIT.16 R-----              | ---YVNNYGS RY       | HepG2.4 NS-----     | ---APTL RAY        | SKBR3.42 NL-----      | ---DQAL SNY  |

**Figure S2. Alignment of the combined 200 VHH clone CDR3 sequences.** A total of 200 VHH clones (top50 VHH clones from each cell-line library) with high amplification factors were aligned using ClustalW. The library names and clone numbers were assigned at the beginning of each CDR3 amino acid sequence. The asterisk (\*) indicates unique CDR3, derived from different libraries. The different colors of the characters in the sequences reflect the properties of the amino acids. These NGS data sequences were deposited in the DDBJ Sequence Read Archive (DRA) under accession number DRA014254.

**Table S1.** Frequency (%) and amplification factor of NGS identified top 50 sequences for each library.

| Clones Name | 0R frequency (%) | 2R frequency (%) | Amplification factor | Clone name | 0R frequency (%) | 2R frequency (%) | Amplification factor | Clone name | 0R frequency (%) | 2R frequency (%) | Amplification factor | Clone name | 0R frequency (%) | 3R frequency (%) | Amplification factor |
|-------------|------------------|------------------|----------------------|------------|------------------|------------------|----------------------|------------|------------------|------------------|----------------------|------------|------------------|------------------|----------------------|
| S1T-1       | 0.00077          | 3.5434           | 4601.79              | SKBR3-1    | 0.00086          | 11.5050          | 13447.25             | HepG2-1    | 0.00086          | 1.5575           | 1820.39              | KYSE520-1  | 0.00086          | 6.2176           | 7267.25              |
| S1T-2       | 0.00077          | 3.2755           | 4253.91              | SKBR3-2    | 0.00077          | 7.7596           | 10077.37             | HepG2-2    | 0.00171          | 2.9427           | 1719.76              | KYSE520-2  | 0.00086          | 5.1733           | 6046.69              |
| S1T-3       | 0.00077          | 3.1517           | 4093.19              | SKBR3-3    | 0.00077          | 1.9021           | 2470.24              | HepG2-3    | 0.00086          | 0.7511           | 877.87               | KYSE520-3  | 0.00077          | 2.3040           | 2992.18              |
| S1T-4       | 0.00077          | 2.5233           | 3277.06              | SKBR3-4    | 0.00077          | 1.4019           | 1820.66              | HepG2-4    | 0.00171          | 1.2855           | 751.29               | KYSE520-4  | 0.00077          | 1.4389           | 1868.73              |
| S1T-5       | 0.00171          | 2.4644           | 1440.23              | SKBR3-5    | 0.00077          | 0.7739           | 1005.13              | HepG2-5    | 0.00077          | 0.4862           | 631.38               | KYSE520-5  | 0.00086          | 0.8373           | 978.69               |
| S1T-6       | 0.00085          | 1.2166           | 1422.07              | SKBR3-6    | 0.00086          | 0.8366           | 977.90               | HepG2-6    | 0.00077          | 0.4667           | 606.09               | KYSE520-6  | 0.00086          | 0.7861           | 918.85               |
| S1T-7       | 0.00085          | 1.1550           | 1350.06              | SKBR3-7    | 0.00077          | 0.7170           | 931.15               | HepG2-7    | 0.00077          | 0.4612           | 599.00               | KYSE520-7  | 0.00171          | 1.4176           | 828.46               |
| S1T-8       | 0.00077          | 0.8877           | 1152.88              | SKBR3-8    | 0.00077          | 0.7141           | 927.43               | HepG2-8    | 0.00077          | 0.4379           | 568.65               | KYSE520-8  | 0.00171          | 1.3888           | 811.63               |
| S1T-9       | 0.00077          | 0.6284           | 816.13               | SKBR3-9    | 0.00077          | 0.5983           | 777.00               | HepG2-9    | 0.00342          | 1.9408           | 567.11               | KYSE520-9  | 0.00077          | 0.5931           | 770.21               |
| S1T-10      | 0.00077          | 0.4725           | 613.66               | SKBR3-10   | 0.00077          | 0.5203           | 675.68               | HepG2-10   | 0.00077          | 0.4184           | 543.35               | KYSE520-10 | 0.00077          | 0.5664           | 735.58               |
| S1T-11      | 0.00077          | 0.4698           | 610.19               | SKBR3-11   | 0.00077          | 0.5126           | 665.73               | HepG2-11   | 0.00513          | 2.1854           | 425.73               | KYSE520-11 | 0.00086          | 0.6016           | 703.16               |
| S1T-12      | 0.00171          | 1.0104           | 590.50               | SKBR3-12   | 0.00077          | 0.4446           | 577.46               | HepG2-12   | 0.00077          | 0.3140           | 407.77               | KYSE520-12 | 0.00257          | 1.7440           | 679.47               |
| S1T-13      | 0.00085          | 0.4285           | 500.95               | SKBR3-13   | 0.00077          | 0.4370           | 567.52               | HepG2-13   | 0.12833          | 47.820           | 372.62               | KYSE520-13 | 0.00086          | 0.5632           | 658.28               |
| S1T-14      | 0.00077          | 0.3434           | 445.98               | SKBR3-14   | 0.00077          | 0.4288           | 556.95               | HepG2-14   | 0.00257          | 0.8547           | 332.99               | KYSE520-14 | 0.00077          | 0.4629           | 601.21               |
| S1T-15      | 0.00077          | 0.3187           | 413.98               | SKBR3-15   | 0.00077          | 0.3949           | 512.82               | HepG2-15   | 0.00077          | 0.2220           | 288.37               | KYSE520-15 | 0.00077          | 0.4256           | 552.72               |
| S1T-16      | 0.00077          | 0.3096           | 402.15               | SKBR3-16   | 0.00077          | 0.3609           | 468.68               | HepG2-16   | 0.00941          | 2.4573           | 261.11               | KYSE520-16 | 0.00086          | 0.4053           | 473.76               |
| S1T-17      | 0.00077          | 0.2909           | 377.80               | SKBR3-17   | 0.00077          | 0.3480           | 451.90               | HepG2-17   | 0.00077          | 0.1807           | 234.74               | KYSE520-17 | 0.00077          | 0.3605           | 468.22               |
| S1T-18      | 0.00077          | 0.2813           | 365.28               | SKBR3-18   | 0.00077          | 0.3207           | 416.47               | HepG2-18   | 0.00086          | 0.1963           | 229.48               | KYSE520-18 | 0.00077          | 0.3168           | 411.42               |
| S1T-19      | 0.00085          | 0.3091           | 361.31               | SKBR3-19   | 0.04877          | 20.128           | 412.75               | HepG2-19   | 0.00077          | 0.1449           | 188.20               | KYSE520-19 | 0.00077          | 0.2816           | 365.71               |
| S1T-20      | 0.00077          | 0.2754           | 357.62               | SKBR3-20   | 0.00086          | 0.3499           | 408.95               | HepG2-20   | 0.00342          | 0.5781           | 168.92               | KYSE520-20 | 0.00086          | 0.3093           | 361.55               |
| S1T-21      | 0.00077          | 0.2513           | 326.31               | SKBR3-21   | 0.00077          | 0.3020           | 392.23               | HepG2-21   | 0.00086          | 0.1433           | 167.56               | KYSE520-21 | 0.00077          | 0.2773           | 360.17               |
| S1T-22      | 0.00171          | 0.5357           | 313.09               | SKBR3-22   | 0.00171          | 0.5011           | 292.87               | HepG2-22   | 0.00077          | 0.1161           | 150.76               | KYSE520-22 | 0.00077          | 0.2453           | 318.61               |
| S1T-23      | 0.00077          | 0.2352           | 305.44               | SKBR3-23   | 0.00171          | 0.4911           | 286.99               | HepG2-23   | 0.00171          | 0.2470           | 144.34               | KYSE520-23 | 0.00077          | 0.2432           | 315.84               |
| S1T-24      | 0.00077          | 0.2288           | 297.09               | SKBR3-24   | 0.00428          | 1.2109           | 283.08               | HepG2-24   | 0.00086          | 0.1153           | 134.78               | KYSE520-24 | 0.02396          | 7.4027           | 309.01               |
| S1T-25      | 0.00257          | 0.7468           | 290.97               | SKBR3-25   | 0.00513          | 1.4148           | 275.62               | HepG2-25   | 0.00086          | 0.1067           | 124.76               | KYSE520-25 | 0.00077          | 0.2368           | 307.53               |
| S1T-26      | 0.00077          | 0.2170           | 281.78               | SKBR3-26   | 0.00171          | 0.4403           | 257.34               | HepG2-26   | 0.00077          | 0.0834           | 108.27               | KYSE520-26 | 0.00077          | 0.2336           | 303.37               |
| S1T-27      | 0.00427          | 1.1117           | 259.87               | SKBR3-27   | 0.00684          | 1.6259           | 237.55               | HepG2-27   | 0.00342          | 0.3498           | 102.22               | KYSE520-27 | 0.00077          | 0.2315           | 300.60               |
| S1T-28      | 0.00077          | 0.1907           | 247.69               | SKBR3-28   | 0.00086          | 0.1876           | 219.30               | HepG2-28   | 0.00077          | 0.0771           | 100.17               | KYSE520-28 | 0.00513          | 1.4944           | 291.11               |
| S1T-29      | 0.00085          | 0.2009           | 234.82               | SKBR3-29   | 0.02823          | 5.9126           | 209.42               | HepG2-29   | 0.00077          | 0.0717           | 93.09                | KYSE520-29 | 0.00086          | 0.2389           | 279.27               |
| S1T-30      | 0.00077          | 0.1795           | 233.08               | SKBR3-30   | 0.00086          | 0.1728           | 201.96               | HepG2-30   | 0.00171          | 0.1543           | 90.15                | KYSE520-30 | 0.00171          | 0.4757           | 278.02               |
| S1T-31      | 0.00077          | 0.1746           | 226.82               | SKBR3-31   | 0.00342          | 0.6748           | 197.20               | HepG2-31   | 0.00086          | 0.0763           | 89.24                | KYSE520-31 | 0.00171          | 0.4299           | 251.22               |
| S1T-32      | 0.00077          | 0.1687           | 219.17               | SKBR3-32   | 0.00086          | 0.1680           | 196.36               | HepG2-32   | 0.00077          | 0.0615           | 79.93                | KYSE520-32 | 0.00077          | 0.1845           | 239.65               |
| S1T-33      | 0.00085          | 0.1779           | 207.89               | SKBR3-33   | 0.00770          | 1.4818           | 192.45               | HepG2-33   | 0.00077          | 0.0600           | 77.91                | KYSE520-33 | 0.00086          | 0.2048           | 239.37               |
| S1T-34      | 0.00077          | 0.1452           | 188.55               | SKBR3-34   | 0.00077          | 0.1479           | 192.07               | HepG2-34   | 0.00077          | 0.0600           | 77.91                | KYSE520-34 | 0.00077          | 0.1749           | 227.18               |
| S1T-35      | 0.00077          | 0.1382           | 179.51               | SKBR3-35   | 0.00086          | 0.1618           | 189.09               | HepG2-35   | 0.00077          | 0.0584           | 75.89                | KYSE520-35 | 0.02909          | 6.5952           | 226.72               |
| S1T-36      | 0.00930          | 12.039           | 173.72               | SKBR3-36   | 0.00077          | 0.1292           | 167.83               | HepG2-36   | 0.00077          | 0.0584           | 75.89                | KYSE520-36 | 0.00342          | 0.7627           | 222.85               |
| S1T-37      | 0.00077          | 0.1318           | 171.16               | SKBR3-37   | 0.00171          | 0.2623           | 153.28               | HepG2-37   | 0.00077          | 0.0576           | 74.87                | KYSE520-37 | 0.00077          | 0.1707           | 221.64               |
| S1T-38      | 0.00077          | 0.1318           | 171.15               | SKBR3-38   | 0.00086          | 0.1292           | 151.05               | HepG2-38   | 0.00086          | 0.0639           | 74.67                | KYSE520-38 | 0.00077          | 0.1632           | 211.95               |
| S1T-39      | 0.00077          | 0.1275           | 165.59               | SKBR3-39   | 0.00171          | 0.2388           | 139.58               | HepG2-39   | 0.00077          | 0.0561           | 72.85                | KYSE520-39 | 0.00077          | 0.1589           | 206.40               |
| S1T-40      | 0.00077          | 0.1264           | 164.20               | SKBR3-40   | 0.00077          | 0.1048           | 136.13               | HepG2-40   | 0.00077          | 0.0553           | 71.84                | KYSE520-40 | 0.00171          | 0.3296           | 192.62               |

|        |         |        |        |          |         |        |        |          |         |        |       |            |         |        |        |
|--------|---------|--------|--------|----------|---------|--------|--------|----------|---------|--------|-------|------------|---------|--------|--------|
| S1T-41 | 0.00077 | 0.1216 | 157.94 | SKBR3-41 | 0.00077 | 0.1024 | 133.02 | HepG2-41 | 0.00086 | 0.0608 | 71.03 | KYSE520-41 | 0.00077 | 0.1419 | 184.24 |
| S1T-42 | 0.04021 | 5.9425 | 147.78 | SKBR3-42 | 0.00077 | 0.0981 | 127.43 | HepG2-42 | 0.00086 | 0.0608 | 71.03 | KYSE520-42 | 0.00428 | 0.7595 | 177.53 |
| S1T-43 | 0.00077 | 0.1125 | 146.11 | SKBR3-43 | 0.00077 | 0.0952 | 123.70 | HepG2-43 | 0.00077 | 0.0537 | 69.82 | KYSE520-43 | 0.00077 | 0.1365 | 177.31 |
| S1T-44 | 0.00077 | 0.1093 | 141.93 | SKBR3-44 | 0.00077 | 0.0756 | 98.21  | HepG2-44 | 0.00077 | 0.0530 | 68.80 | KYSE520-44 | 0.00077 | 0.1344 | 174.54 |
| S1T-45 | 0.00077 | 0.1082 | 140.54 | SKBR3-45 | 0.00171 | 0.1503 | 87.83  | HepG2-45 | 0.00077 | 0.0514 | 66.78 | KYSE520-45 | 0.00077 | 0.1259 | 163.46 |
| S1T-46 | 0.00077 | 0.1012 | 131.50 | SKBR3-46 | 0.00086 | 0.0742 | 86.71  | HepG2-46 | 0.00077 | 0.0506 | 65.77 | KYSE520-46 | 0.00077 | 0.1259 | 163.46 |
| S1T-47 | 0.00077 | 0.1007 | 130.80 | SKBR3-47 | 0.00086 | 0.0737 | 86.15  | HepG2-47 | 0.00077 | 0.0491 | 63.74 | KYSE520-47 | 0.00077 | 0.1237 | 160.69 |
| S1T-48 | 0.00077 | 0.0996 | 129.41 | SKBR3-48 | 0.00077 | 0.0656 | 85.16  | HepG2-48 | 0.00077 | 0.0491 | 63.74 | KYSE520-48 | 0.00086 | 0.1355 | 158.33 |
| S1T-49 | 0.00085 | 0.1018 | 118.97 | SKBR3-49 | 0.00086 | 0.0713 | 83.35  | HepG2-49 | 0.00077 | 0.0483 | 62.73 | KYSE520-49 | 0.00077 | 0.1205 | 156.53 |
| S1T-50 | 0.00257 | 0.3048 | 118.77 | SKBR3-50 | 0.00171 | 0.1407 | 82.24  | HepG2-50 | 0.00077 | 0.0483 | 62.73 | KYSE520-50 | 0.00077 | 0.1184 | 153.76 |

**Table S2.** List of designed CDR3-specific primer sets for overlapping PCR.

| Group Name | Forward Primer                 | Reverse Primer                  | nt | Tm (°C) | GC (%) |
|------------|--------------------------------|---------------------------------|----|---------|--------|
| Group A    | 5'-TGTAATTCGGCGCCGACGCT-3'     | 5'-AGCGTCGGCGCCGAATTACA-3'      | 20 | 62.3    | 60     |
| Group B    | 5'-GGATCGCGTTACTACGGCC-3'      | 5'-GGCCGTAGTAACGCGATCC-3'       | 19 | 58      | 63.2   |
| Group C    | 5'-TGCAATACCCTTCGGACGCCAGTA-3' | 5'-TACTGGCGTCCGAAGGGTATTGCA-3'  | 24 | 62.5    | 54.2   |
| Group D    | 5'-TGTAATACCGTAAGGCAACCCTTT-3' | 5'-AAAGGGTTGCCTTACGGTATTACA-3'  | 24 | 56.7    | 41.7   |
| Group E    | 5'-TGTGCAATGGGGGACATGTACTCT-3' | 5'-AGAGTACATGTCCCCCATTCACACA-3' | 24 | 60.3    | 50     |
| Group F    | 5'-TGTAATCTACAGCAAGCGCTTTCG-3' | 5'-CGAAAGCGCTTGCTGTAGATTACA-3'  | 24 | 58.5    | 45.8   |
| Group G    | TGTAATGCCCCGAGCGAGTAGTAGT-3'   | 5'-ACTACTACTCGCTCGGGCATTACA-3'  | 24 | 59.7    | 50     |
| Group X    | 5'-TGCAGCAGATCAATATTGCGGCTG-3' | 5'-CAGCCGCAATATTGATCTGCTGCA-3'  | 24 | 60.8    | 50     |
| Group Y    | 5'-TCGTCAATACATGGTTGGGGTCAC-3' | 5'-GTGACCCCAACCATGTATTGACGA-3'  | 24 | 59.4    | 50     |
| Group Z    | 5'-TGTTTCGTCACTCATAGCGACTGG-3' | 5'-CCAGTCGCTATGAGTGACGAAACA-3'  | 24 | 59.4    | 50     |
